# Supplementary material for: The relationship between polar mesospheric clouds and their background atmosphere as observed by Odin-SMR and Odin-OSIRIS
Source: Copernicus journal article supplement (doi:10.5194/acp-16-12587-2016), 2016-10-10
Supplement: Supplementary file 1 [file acp-16-12587-2016-supplement.zip]

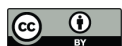

## *Supplement of*

# **The relationship between polar mesospheric clouds and their background atmosphere as observed by Odin-SMR and Odin-OSIRIS**

**Ole Martin Christensen et al.**

*Correspondence to:* Ole Martin Christensen (olemartin.christensen@misu.su.se)

- acp-16-12587-2016-supplement-title-page.pdf
- Data\_for\_upload
  - Code
    - \* constants.m
    - \* critical\_radius\_ice.m
    - \* e\_eq\_ice\_mk.m
    - \* kelvin\_term.m
    - \* nd2vmr.m
    - \* odin\_tomography\_orbits.m
    - \* old\_orbits.mat
    - \* pmc\_0d\_model.m
    - \* run\_model\_all\_v6\_newdata.m
  - OSIRIS
    - \* OSIRIS\_tomography\_gauss\_B\_alpha4.4.mat
  - README
  - SMR
    - \* L2\_2010\_6\_16\_50791.mat
    - \* L2\_2010\_6\_16\_50792.mat
    - \* L2\_2010\_6\_16\_50793.mat
    - \* L2\_2010\_6\_16\_50794.mat
    - \* L2\_2010\_6\_16\_50795.mat
    - \* L2\_2010\_6\_16\_50796.mat
    - \* L2\_2010\_6\_16\_50797.mat
    - \* L2\_2010\_6\_16\_50798.mat
    - \* L2\_2010\_6\_17\_50799.mat
    - \* L2\_2010\_6\_17\_50800.mat

- \* L2\_2010\_6\_17\_50801.mat
- \* L2\_2010\_6\_17\_50803.mat
- \* L2\_2010\_7\_14\_51211.mat
- \* L2\_2010\_7\_14\_51212.mat
- \* L2\_2010\_7\_14\_51214.mat
- \* L2\_2010\_7\_14\_51217.mat
- \* L2\_2010\_7\_15\_51220.mat
- \* L2\_2010\_7\_15\_51221.mat
- \* L2\_2010\_7\_15\_51222.mat
- \* L2\_2010\_7\_15\_51224.mat
- \* L2\_2010\_7\_15\_51225.mat
- \* L2\_2010\_7\_15\_51226.mat
- \* L2\_2010\_7\_15\_51227.mat
- \* L2\_2010\_7\_15\_51230.mat
- \* L2\_2010\_7\_15\_51231.mat
- \* L2\_2010\_7\_15\_51232.mat
- \* L2\_2010\_7\_16\_51234.mat
- \* L2\_2010\_7\_16\_51235.mat
- \* L2\_2010\_7\_16\_51236.mat
- \* L2\_2010\_7\_16\_51237.mat
- \* L2\_2010\_8\_12\_51642.mat
- \* L2\_2010\_8\_12\_51643.mat
- \* L2\_2010\_8\_12\_51644.mat
- \* L2\_2010\_8\_12\_51645.mat
- \* L2\_2010\_8\_12\_51646.mat
- \* L2\_2010\_8\_12\_51647.mat
- \* L2\_2010\_8\_12\_51648.mat
- \* L2\_2010\_8\_12\_51649.mat
- \* L2\_2010\_8\_12\_51650.mat
- \* L2\_2010\_8\_13\_51651.mat
- \* L2\_2010\_8\_13\_51652.mat
- \* L2\_2010\_8\_13\_51653.mat
- \* L2\_2010\_8\_13\_51655.mat
- \* L2\_2010\_8\_13\_51657.mat
- \* L2\_2010\_8\_13\_51658.mat
- \* L2\_2010\_8\_13\_51659.mat
- \* L2\_2010\_8\_13\_51660.mat
- \* L2\_2010\_8\_13\_51661.mat
- \* L2\_2010\_8\_13\_51662.mat
- \* L2\_2010\_8\_13\_51663.mat
- \* L2\_2010\_8\_13\_51664.mat
- \* L2\_2010\_8\_14\_51666.mat
- \* L2\_2010\_8\_14\_51667.mat
- \* L2\_2010\_8\_14\_51668.mat
- \* L2\_2010\_8\_14\_51669.mat
- \* L2\_2010\_8\_14\_51670.mat
- \* L2\_2010\_8\_14\_51671.mat

- \* L2\_2011\_6\_15\_56235.mat
- \* L2\_2011\_6\_15\_56236.mat
- \* L2\_2011\_6\_15\_56237.mat
- \* L2\_2011\_6\_15\_56238.mat
- \* L2\_2011\_6\_15\_56239.mat
- \* L2\_2011\_6\_15\_56240.mat
- \* L2\_2011\_6\_15\_56241.mat
- \* L2\_2011\_6\_16\_56242.mat
- \* L2\_2011\_6\_16\_56243.mat
- \* L2\_2011\_6\_16\_56244.mat
- \* L2\_2011\_6\_16\_56247.mat
- \* L2\_2011\_6\_16\_56248.mat
- \* L2\_2011\_6\_16\_56249.mat
- \* L2\_2011\_6\_16\_56250.mat
- \* L2\_2011\_6\_16\_56251.mat
- \* L2\_2011\_6\_16\_56252.mat
- \* L2\_2011\_6\_16\_56254.mat
- \* L2\_2011\_6\_16\_56255.mat
- \* L2\_2011\_6\_16\_56256.mat
- \* L2\_2011\_6\_17\_56257.mat
- \* L2\_2011\_6\_17\_56258.mat
- \* L2\_2011\_6\_17\_56259.mat
- \* L2\_2011\_6\_17\_56260.mat
- \* L2\_2011\_7\_17\_56711.mat
- \* L2\_2011\_7\_17\_56712.mat
- \* L2\_2011\_7\_17\_56715.mat
- \* L2\_2011\_7\_17\_56718.mat
- \* L2\_2011\_7\_17\_56719.mat
- \* L2\_2011\_7\_18\_56720.mat
- \* L2\_2011\_7\_18\_56721.mat
- \* L2\_2011\_7\_18\_56722.mat
- \* L2\_2011\_7\_18\_56723.mat
- \* L2\_2011\_7\_18\_56724.mat
- \* L2\_2011\_7\_18\_56726.mat
- \* L2\_2011\_7\_18\_56727.mat
- \* L2\_2011\_7\_18\_56728.mat
- \* L2\_2011\_7\_18\_56729.mat
- \* L2\_2011\_7\_18\_56730.mat
- \* L2\_2011\_7\_18\_56731.mat
- \* L2\_2011\_7\_18\_56732.mat
- \* L2\_2011\_7\_18\_56733.mat
- \* L2\_2011\_7\_18\_56734.mat
- \* L2\_2011\_7\_19\_56735.mat
- \* L2\_2011\_7\_19\_56736.mat
- \* L2\_2011\_7\_19\_56737.mat
- \* L2\_2011\_7\_19\_56738.mat
- \* L2\_2011\_7\_19\_56739.mat

- \* L2\_2011\_8\_18\_57190.mat
- \* L2\_2011\_8\_18\_57191.mat
- \* L2\_2011\_8\_18\_57192.mat
- \* L2\_2011\_8\_18\_57193.mat
- \* L2\_2011\_8\_18\_57194.mat
- \* L2\_2011\_8\_18\_57195.mat
- \* L2\_2011\_8\_18\_57196.mat
- \* L2\_2011\_8\_18\_57197.mat
- \* L2\_2011\_8\_18\_57198.mat
- \* L2\_2011\_8\_19\_57199.mat
- \* L2\_2011\_8\_19\_57200.mat
- \* L2\_2011\_8\_19\_57202.mat
- \* L2\_2011\_8\_19\_57203.mat
- \* README.m

The copyright of individual parts of the supplement might differ from the CC-BY 3.0 licence.
